# Supplementary material for: Simultaneous measurement of piperacillin, tazobactam and meropenem in patient samples using LC-MS/MS to support β-lactam therapeutic drug monitoring
Source: Royal Society of Chemistry journal article supplement (doi:10.1039/d6ay00331a), 2026-05-15
Supplement: d6ay00331a1.pdf [file d6ay00331a1.pdf]

### Supplementary Information

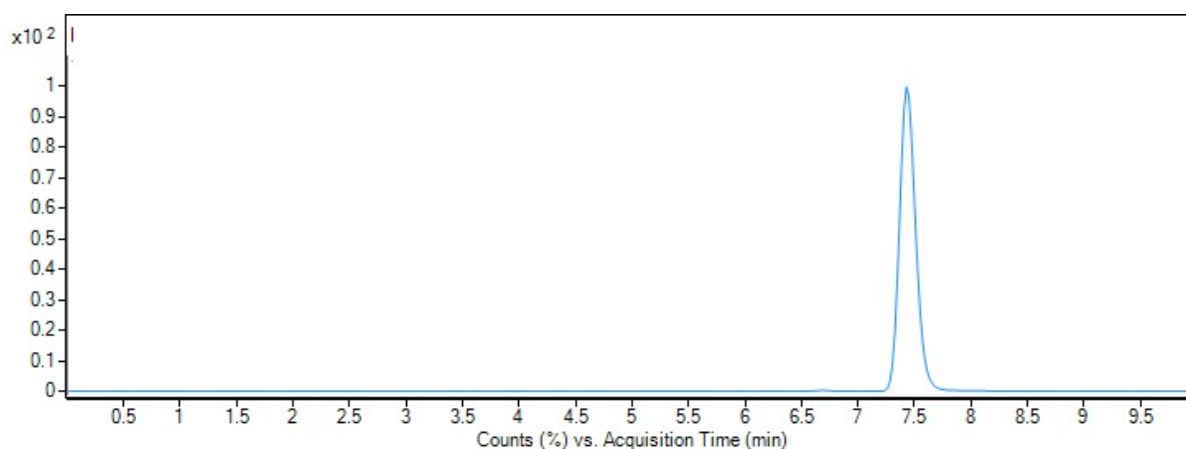

**Figure S1:** LC-MS chromatogram of piperacillin analytical standard showing a single, sharp peak at a retention time (RT) of 7.4 min.

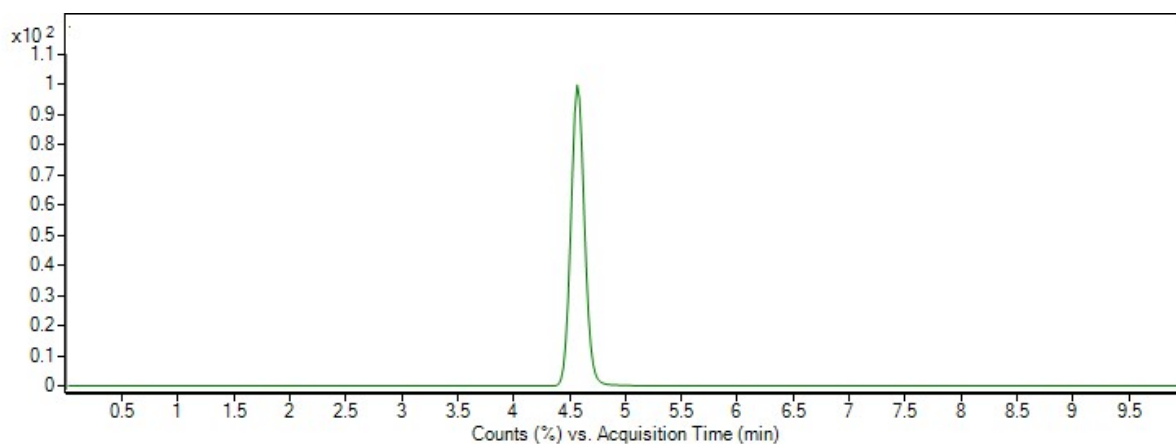

**Figure S2:** LC-MS chromatogram of tazobactam analytical standard showing a single, sharp peak at a retention time (RT) of 4.6 min.

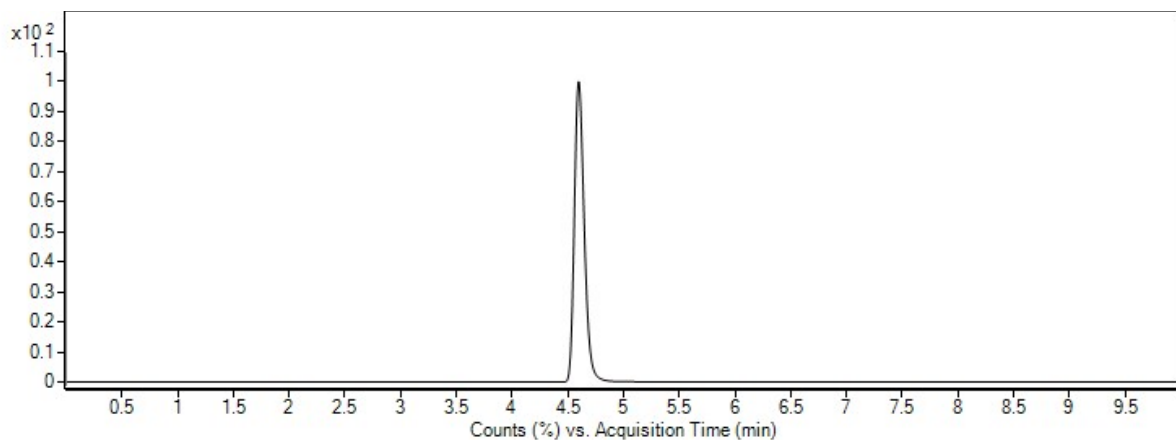

**Figure S3:** LC-MS chromatogram of meropenem analytical standard showing a single, sharp peak at a retention time (RT) of 4.6 min.

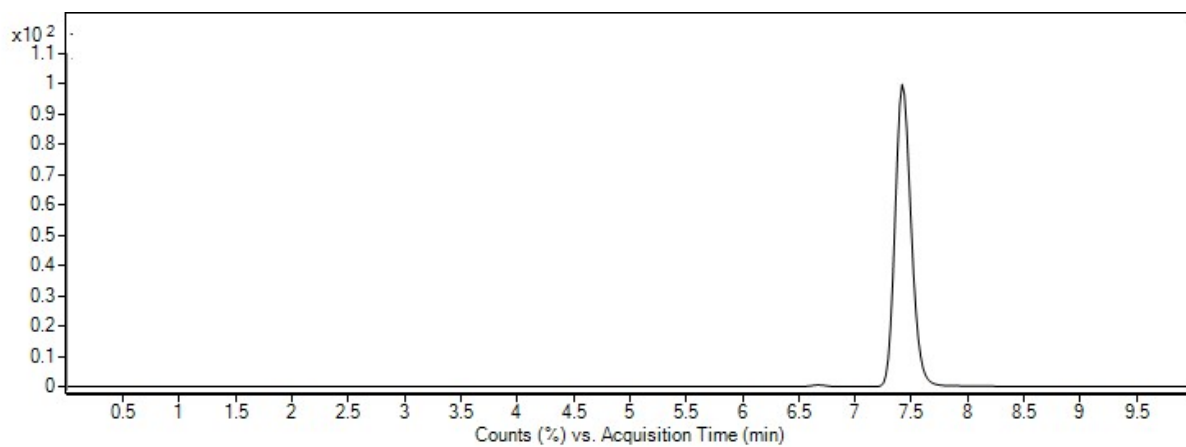

**Figure S4:** LC-MS chromatogram of piperacillin IS showing a single, sharp peak at a retention time (RT) of 7.4 min.

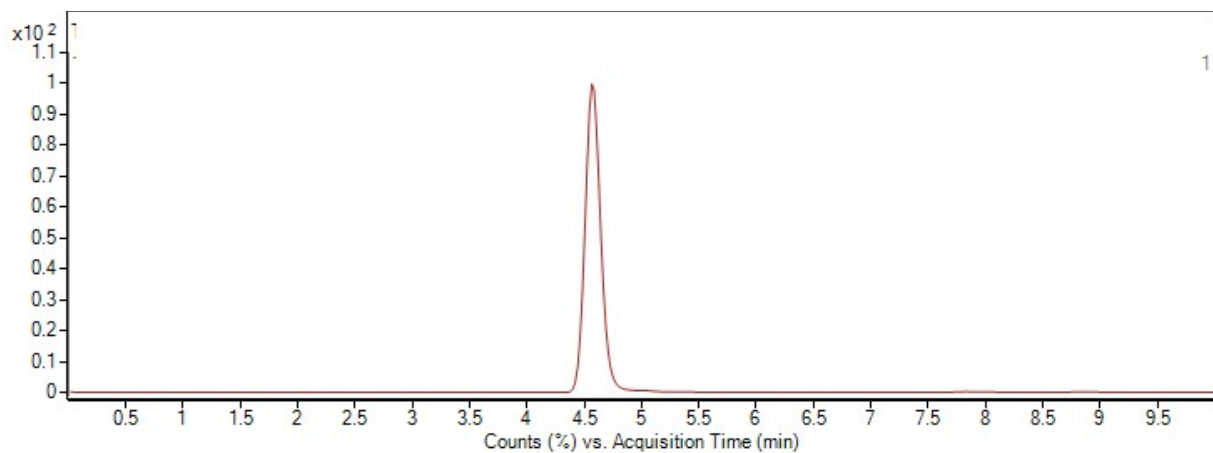

**Figure S5:** LC-MS chromatogram of tazobactam IS showing a single, sharp peak at a retention time (RT) of 4.6 min.

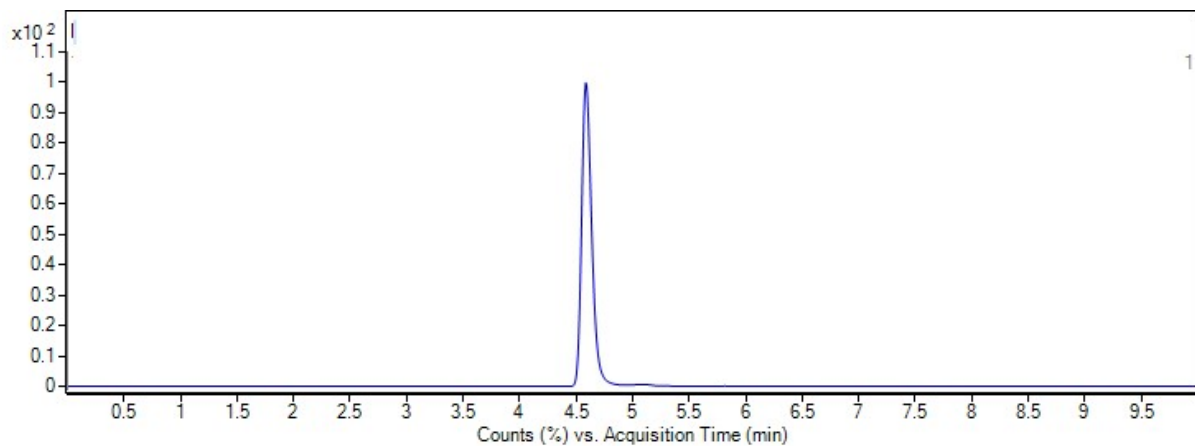

**Figure S6:** LC-MS chromatogram of meropenem IS showing a single, sharp peak at a retention time (RT) of 4.6 min.

**Table S1. Accuracy and precision data for meropenem, piperacillin and tazobactam.**

| <b>Analyte</b> | <b>Level</b> | <b>Nominal concentration</b> | <b>Mean measured concentration</b> | <b>SD</b> | <b>Accuracy (%Bias)</b> | <b>Precision (%CV)</b> |
|----------------|--------------|------------------------------|------------------------------------|-----------|-------------------------|------------------------|
| Meropenem      | L1           | 45000                        | 45635                              | 911       | 1.41                    | 2.00                   |
|                | L2           | 15000                        | 15592                              | 393       | 3.95                    | 2.52                   |
|                | L3           | 5000                         | 4897                               | 127       | -2.06                   | 2.59                   |
|                | L4           | 1667                         | 1576                               | 48.6      | -5.44                   | 3.08                   |
|                | L5           | 556                          | 519                                | 13.6      | -6.56                   | 2.63                   |
|                | L6           | 185                          | 164                                | 5.93      | -11.33                  | 3.61                   |
|                | L7           | 61.7                         | 54.0                               | 1.96      | -12.60                  | 3.63                   |
|                | L8           | 20.6                         | 19.1                               | 0.37      | -7.27                   | 1.92                   |
| Piperacillin   | L1           | 135000                       | 138260                             | 4223      | 2.41                    | 3.05                   |
|                | L2           | 45000                        | 45582                              | 1060      | 1.29                    | 2.33                   |
|                | L3           | 15000                        | 14444                              | 1027      | -3.71                   | 7.11                   |
|                | L4           | 5000                         | 4665                               | 217       | -6.69                   | 4.65                   |
|                | L5           | 1667                         | 1558                               | 42.0      | -6.49                   | 2.69                   |
|                | L6           | 556                          | 513                                | 31.2      | -7.73                   | 6.09                   |
|                | L7           | 185                          | 172                                | 6.00      | -7.05                   | 3.48                   |
|                | L8           | 61.7                         | 58.4                               | 2.38      | -5.37                   | 4.08                   |
|                | L9           | 20.6                         | 22.0                               | 0.92      | 6.83                    | 4.21                   |
| Tazobactam     | L1           | 45000                        | 42842                              | 1550      | -4.80                   | 3.62                   |
|                | L2           | 15000                        | 14466                              | 719       | -3.56                   | 4.97                   |
|                | L3           | 5000                         | 4677                               | 215       | -6.46                   | 4.60                   |
|                | L4           | 1667                         | 1475                               | 82.3      | -11.50                  | 5.58                   |
|                | L5           | 556                          | 497                                | 26.2      | -10.46                  | 5.27                   |
|                | L6           | 185                          | 161                                | 9.69      | -12.84                  | 6.00                   |
|                | L7           | 61.7                         | 52.5                               | 3.36      | -14.96                  | 6.40                   |
|                | L8           | 20.6                         | 19.3                               | 2.25      | -6.31                   | 11.67                  |

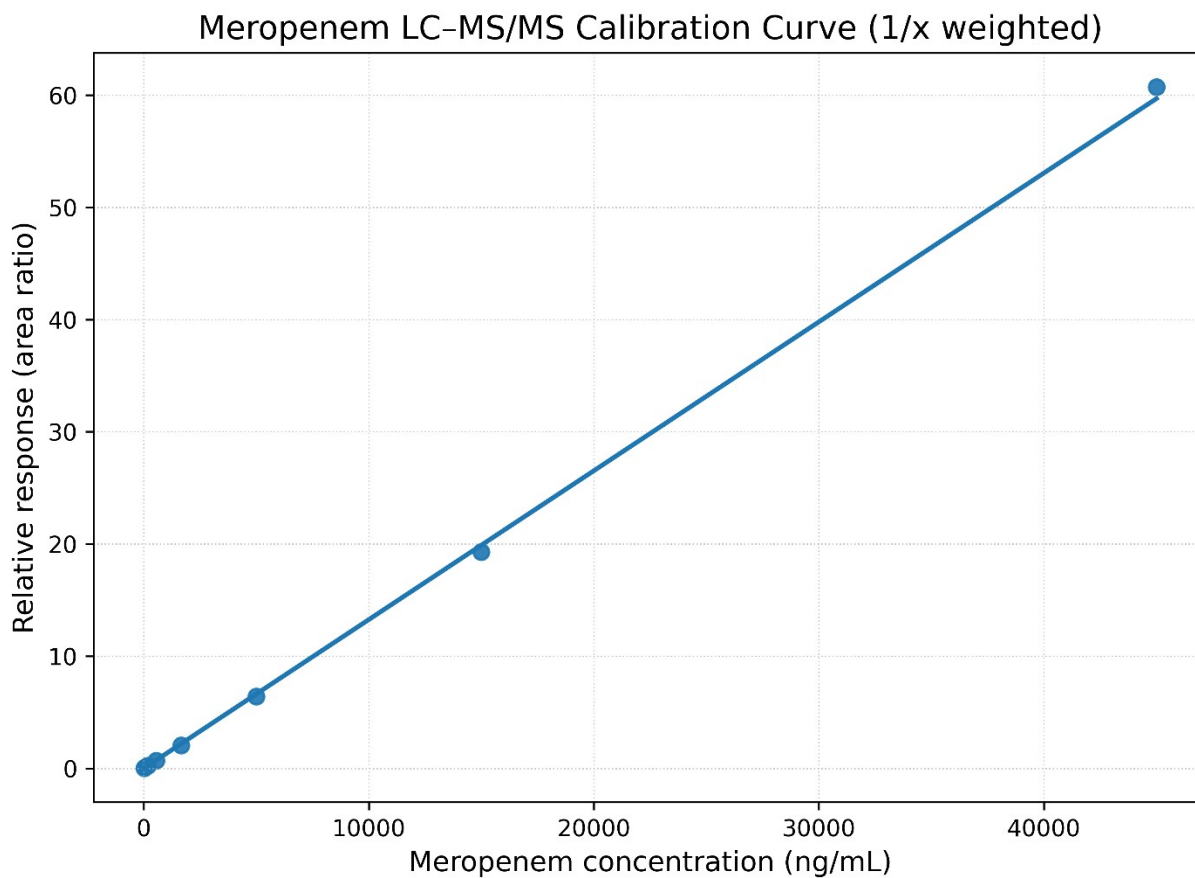

**Figure S7:** Meropenem calibration curve demonstrating excellent linearity across the full range ( $R^2 = 0.999$ ) using a  $1/x$  weighting model ( $y = 3.315815 \cdot x - 0.002110$ ).

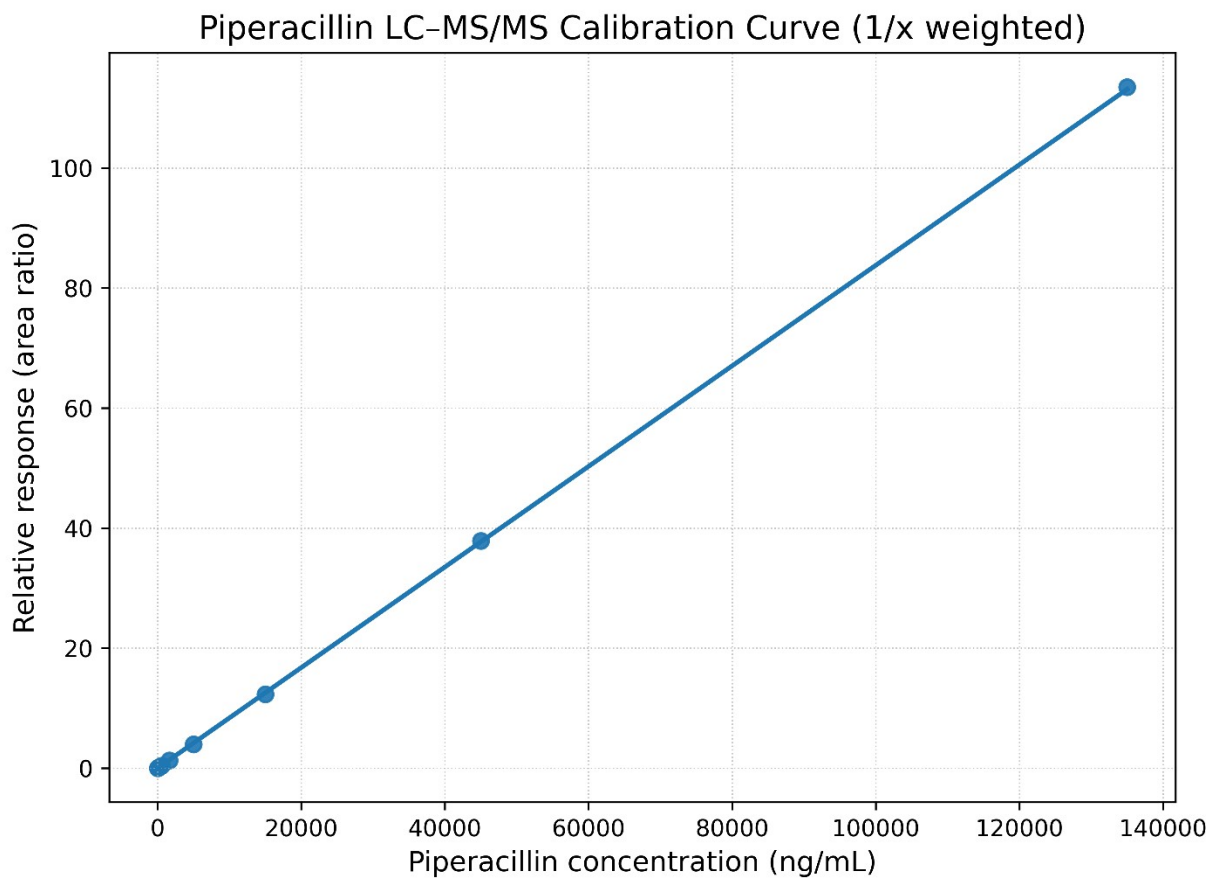

**Figure S8:** Piperacillin calibration curve demonstrating excellent linearity across the full range ( $R^2 = 0.999$ ) using a  $1/x$  weighting model ( $y = 1.047313x - 0.001015$ ).

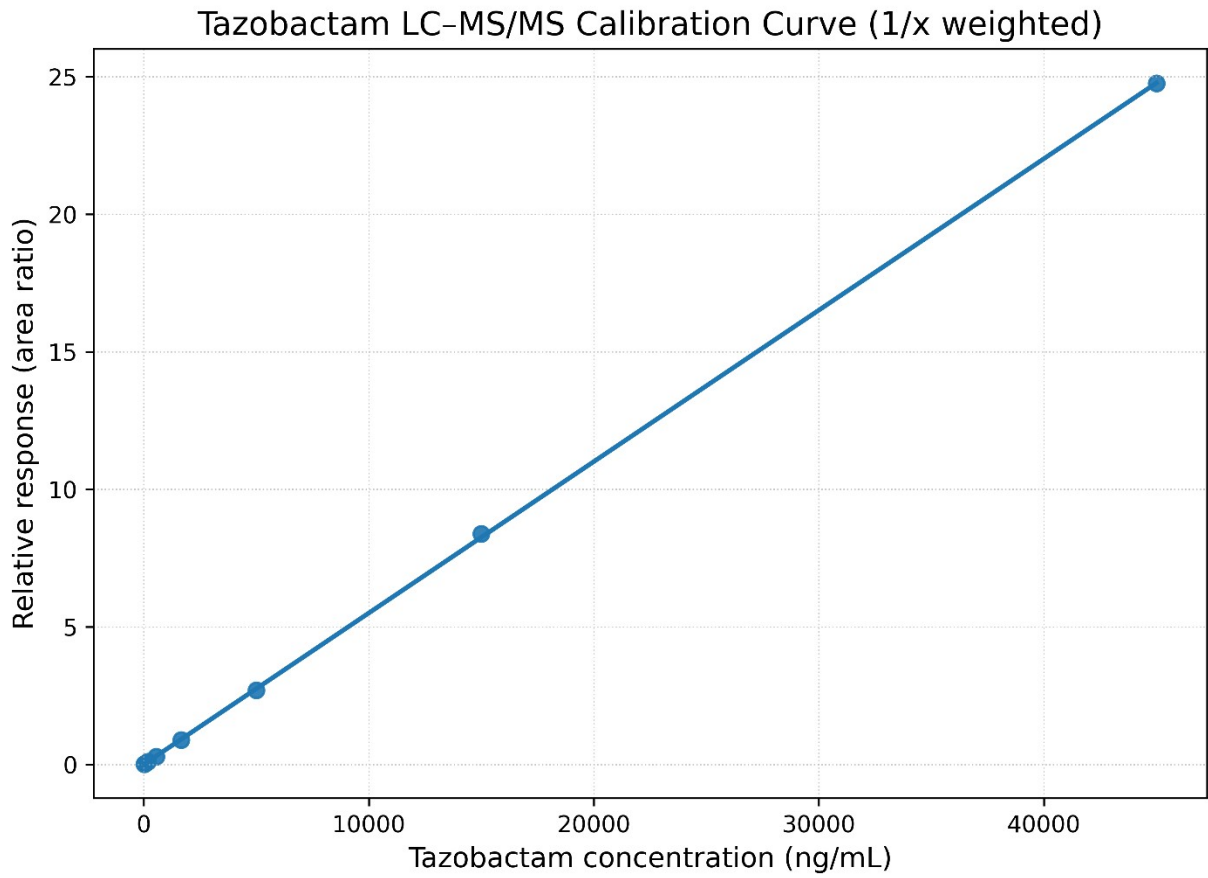

**Figure S9:** Tazobactam calibration curve demonstrating excellent linearity across the full range ( $R^2 = 0.999$ ) using a  $1/x$  weighting model ( $y = 0.688230 \cdot x - 0.001349$ ).

**Table S2. Lower limit of quantification (LLOQ) and upper limit of quantification (ULOQ) performance for analytes.**

| Analyte      | Level | %Bias | %CV  |
|--------------|-------|-------|------|
| Piperacillin | LLOQ  | 6.84  | 4.49 |
|              | ULOQ  | 2.41  | 3.05 |
| Tazobactam   | LLOQ  | -1.19 | 7.37 |
|              | ULOQ  | -4.40 | 3.80 |
| Meropenem    | LLOQ  | -7.27 | 1.92 |
|              | ULOQ  | 1.41  | 2.00 |

**Table S3. Within-run Accuracy and Precision.**

| Analyte      | QC Level | %Bias  | %CV  |
|--------------|----------|--------|------|
| Piperacillin | QC1      | 1.62   | 2.78 |
|              | QC5      | -6.86  | 2.80 |
|              | QC8      | -7.92  | 6.00 |
|              | QC9      | 7.76   | 4.05 |
| Tazobactam   | QC1      | -3.23  | 2.86 |
|              | QC4      | -8.85  | 4.56 |
|              | QC7      | -13.64 | 3.14 |
|              | QC8      | -7.62  | 9.78 |
| Meropenem    | QC1      | 1.35   | 1.79 |
|              | QC4      | -6.21  | 3.23 |
|              | QC7      | -12.75 | 3.27 |
|              | QC8      | -7.01  | 1.80 |

**Table S4. Between-run Accuracy and Precision.**

| <b>Analyte</b> | <b>QC Level</b> | <b>%Bias</b> | <b>%CV</b> |
|----------------|-----------------|--------------|------------|
| Piperacillin   | QC1             | 2.32         | 2.84       |
|                | QC5             | -7.38        | 2.15       |
|                | QC8             | -7.03        | 2.57       |
|                | QC9             | 5.53         | 2.47       |
| Tazobactam     | QC1             | -3.75        | 1.73       |
|                | QC4             | -4.54        | 5.33       |
|                | QC7             | -9.16        | 3.25       |
|                | QC8             | 1.14         | 1.07       |
| Meropenem      | QC1             | 2.20         | 1.45       |
|                | QC4             | -7.58        | 2.47       |
|                | QC7             | -11.54       | 2.08       |
|                | QC8             | -6.24        | 1.71       |

**Table S5. Matrix Effect Summary for Piperacillin, Tazobactam, and Meropenem.**

| <b>Analyte</b> | <b>QC Level</b> | <b>%Bias</b> | <b>%CV</b> |
|----------------|-----------------|--------------|------------|
| Piperacillin   | QC1             | 2.13         | 2.16       |
|                | QC5             | -1.27        | 1.91       |
|                | QC9             | 3.48         | 4.68       |
| Tazobactam     | QC1             | -1.93        | 1.61       |
|                | QC4             | -2.53        | 1.69       |
|                | QC8             | -2.91        | 5.36       |
| Meropenem      | QC1             | -0.06        | 2.36       |
|                | QC4             | -2.05        | 0.68       |
|                | QC8             | -5.31        | 2.93       |

**Table S6. Freeze–thaw stability of piperacillin, tazobactam, and meropenem over three cycles.**

| <b>Analyte</b> | <b>QC Level</b> | <b>%Bias</b> | <b>%CV</b> |
|----------------|-----------------|--------------|------------|
| Piperacillin   | QC1             | 2.10         | 6.79       |
|                | QC5             | -0.30        | 2.71       |
| Tazobactam     | QC1             | -14.21       | 5.87       |
|                | QC4             | -14.88       | 5.85       |
| Meropenem      | QC1             | -2.60        | 3.96       |
|                | QC4             | 14.58        | 5.32       |
|                |                 |              |            |
